# Supplementary material for: Development of a chromium speciation probe based on morphology-dependent aggregation of polymerized vesicle-functionalized gold nanoparticles
Source: Royal Society of Chemistry journal article supplement (doi:10.1039/b909619a), 2009-01-01
Supplement: b909619a.pdf [file b909619a.pdf]

**SUPPLEMENTAL INFORMATION FOR MANUSCRIPT**

**DEVELOPMENT OF A CHROMIUM SPECIATION PROBE BASED ON  
MORPHOLOGY-DEPENDENT AGGREGATION OF POLYMERIZED  
VESICLE-FUNCTIONALIZED GOLD NANOPARTICLES**

Nikolaos I. Kapakoglou<sup>1</sup>, Dimosthenis L. Giokas<sup>1\*</sup>, George Z. Tsogas<sup>1</sup>, Athanasios K.

Lantavos<sup>2</sup>, Athanasios G. Vlessidis<sup>1</sup>

<sup>1</sup> Laboratory of Analytical Chemistry, Department of Chemistry, University of  
Ioannina, 45110, Ioannina, Greece

<sup>2</sup> School of Natural Resources and Enterprise Management, University of Ioannina,  
Agrinio 30100, Greece

---

\* Corresponding author. Phone: +30-26510-08401, Fax: +30-26510-08781, E-mail: [dgiokas@cc.uoi.gr](mailto:dgiokas@cc.uoi.gr)

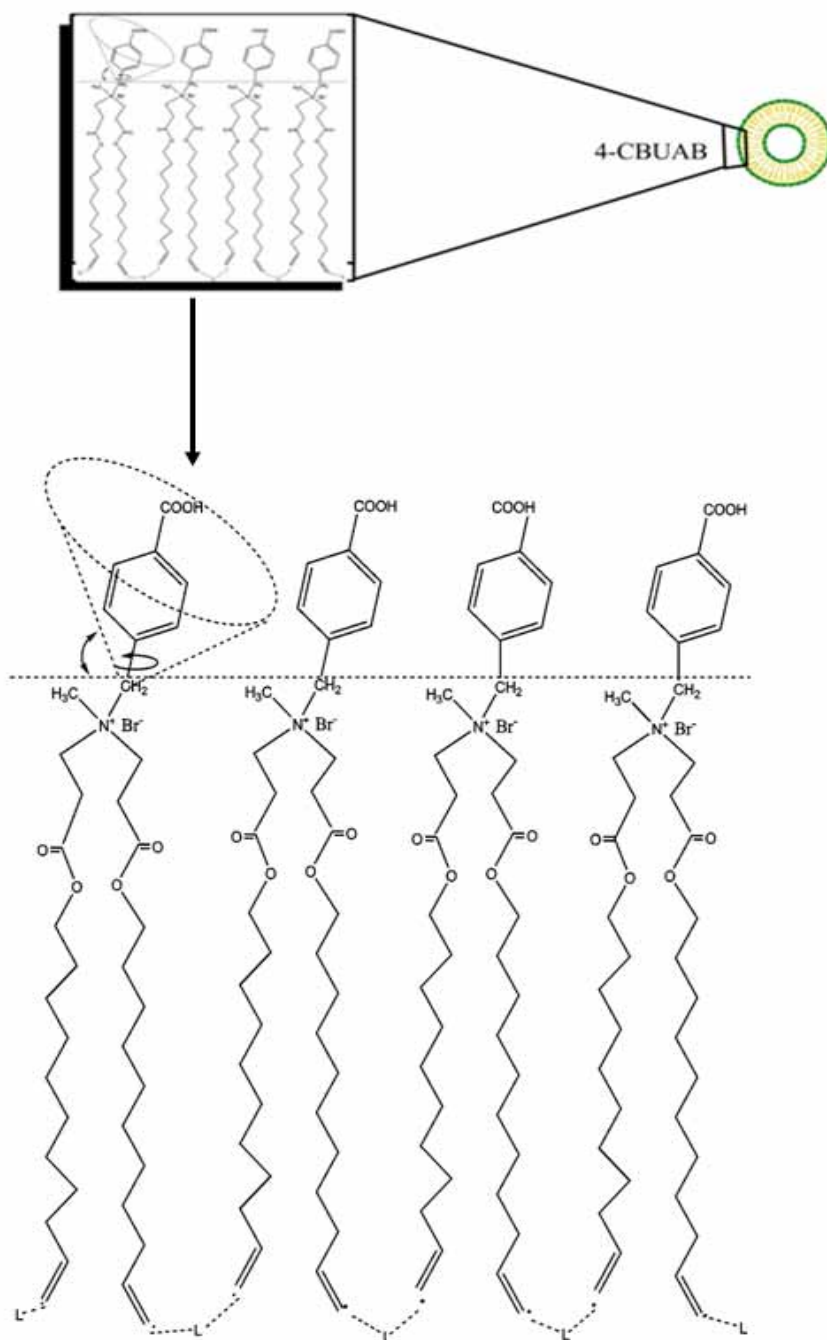

**FIGURE S3.** Magnified 4-CBUAB polymerized vesicle structure
